# Supplementary material for: Development of Water-Soluble Type I Photoinitiators for Hydrogel Synthesis
Source: MDPI journal article supplement (doi:10.3390/macromol2010008), 2022-03-21
Supplement: s1 [file s1]

---

Supporting Information:

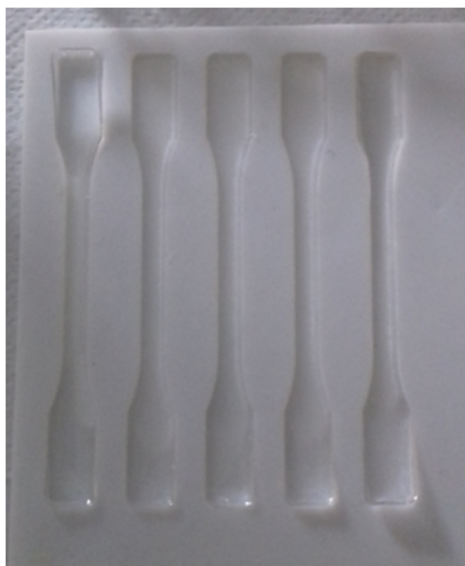

**Figure S1.** Tensile test specimens prepared in Teflon molds upon irradiation with a LED projector @395 nm (170 mW/cm<sup>2</sup>).

**Table S1.** Other chemicals used.

| Chemical Structures  |                                                                                                                                                   |
|----------------------|---------------------------------------------------------------------------------------------------------------------------------------------------|
| BisGMA/TEGDMA        | 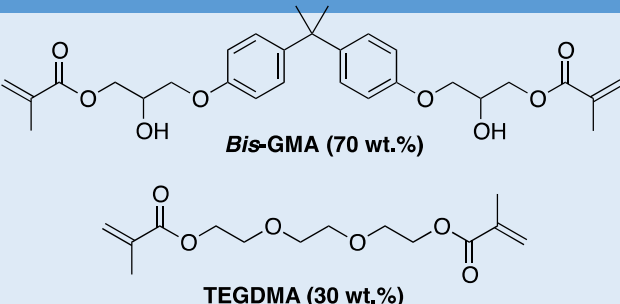 <p><b>Bis-GMA (70 wt.%)</b></p> <p><b>TEGDMA (30 wt.%)</b></p> |
| PEGDA (Mn~600 g/mol) |                                                                 |
| ETPT                 |  <p>with <math>x+y+z = 20</math></p>                           |

*<sup>1</sup>H NMR spectrum of 2-hydroxy-2-methyl-1-(3-aminophenyl)propan-1-one*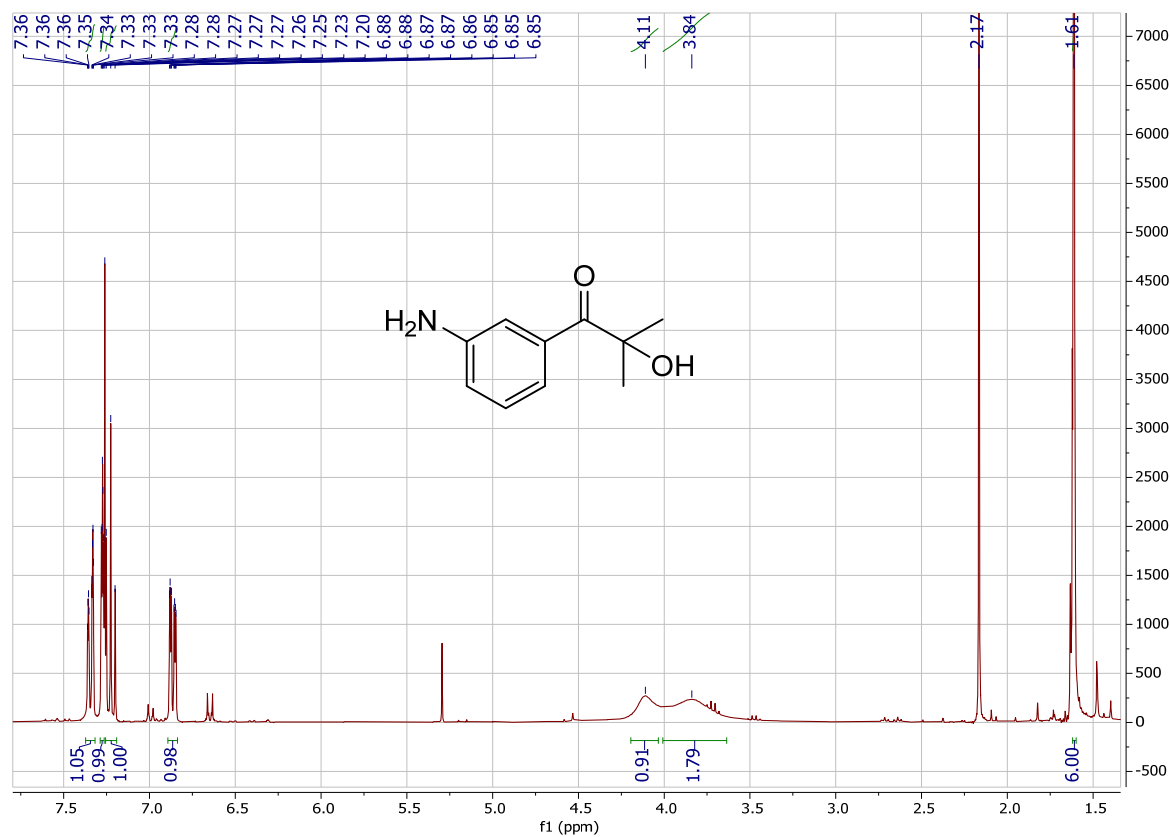*<sup>13</sup>C NMR spectrum of 2-hydroxy-2-methyl-1-(3-aminophenyl)propan-1-one*

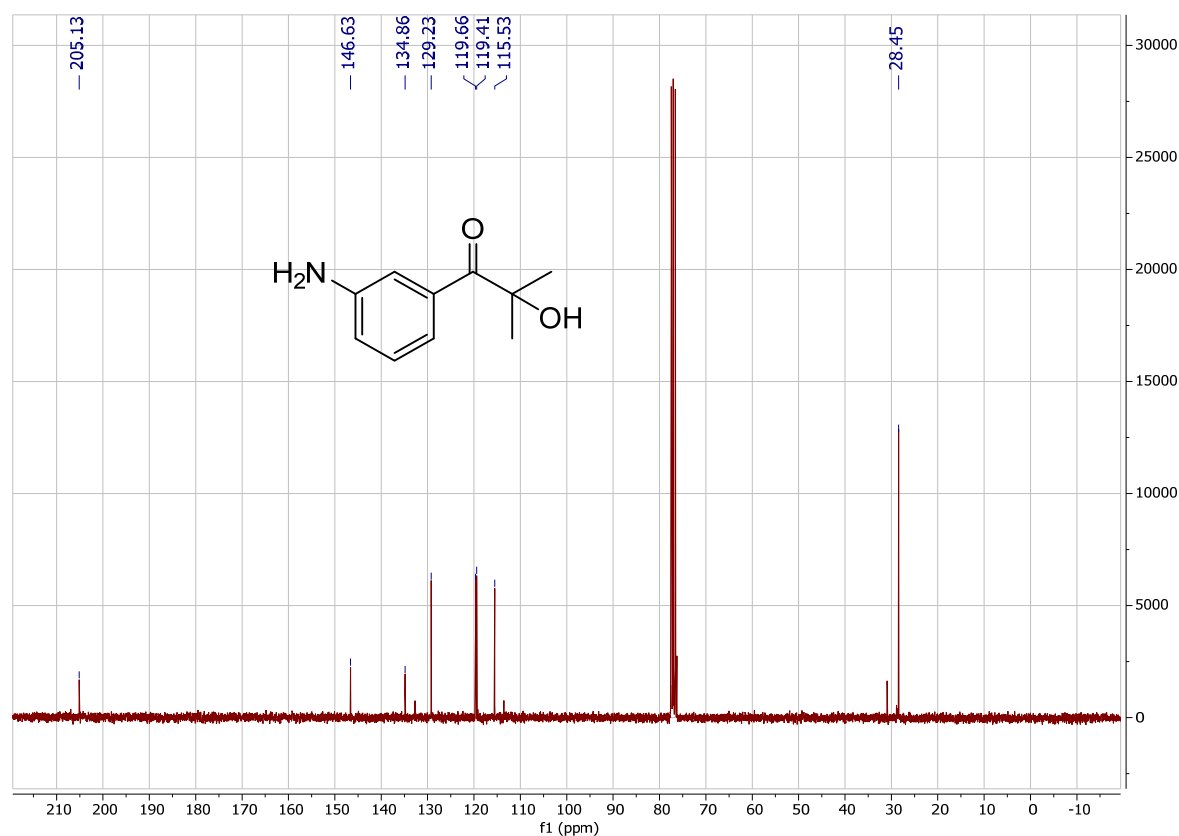

<sup>1</sup>H NMR spectrum of 1-(3-aminophenyl)-2-methoxy-2-methylpropan-1-one

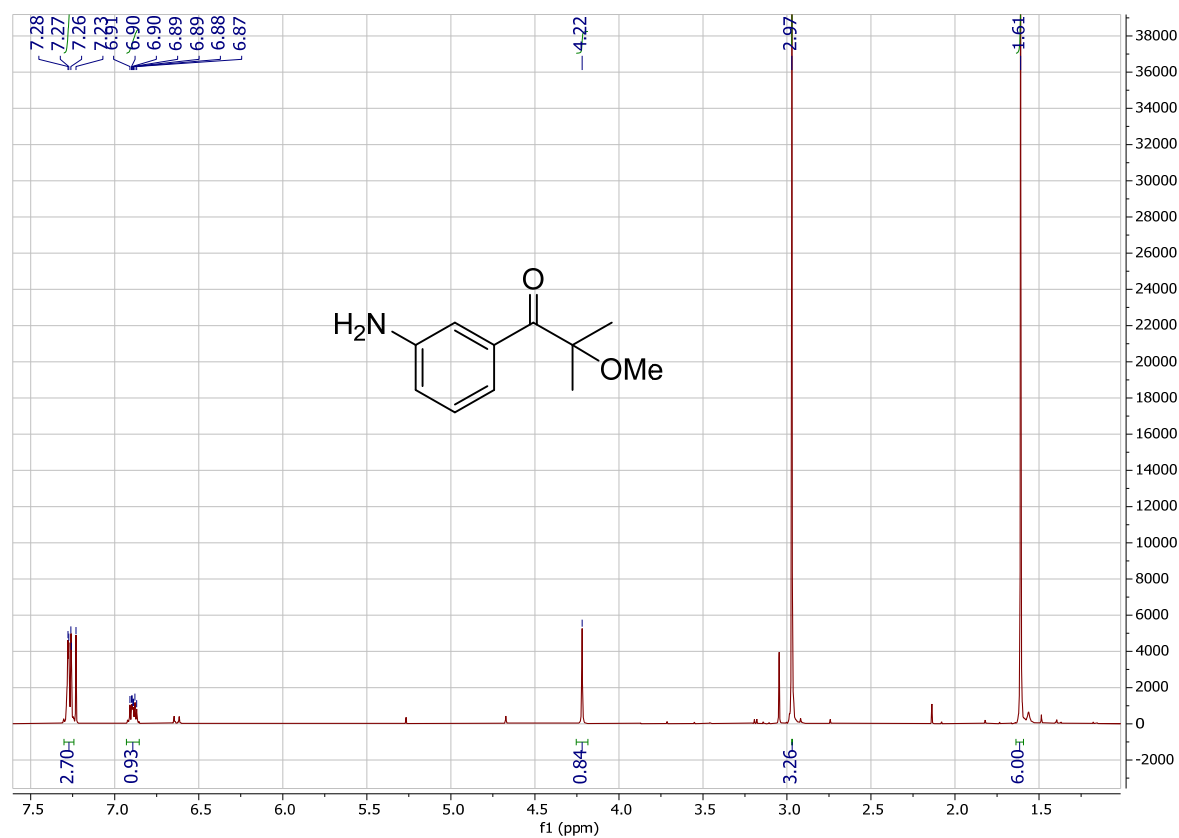

<sup>13</sup>C NMR spectrum of 1-(3-aminophenyl)-2-methoxy-2-methylpropan-1-one

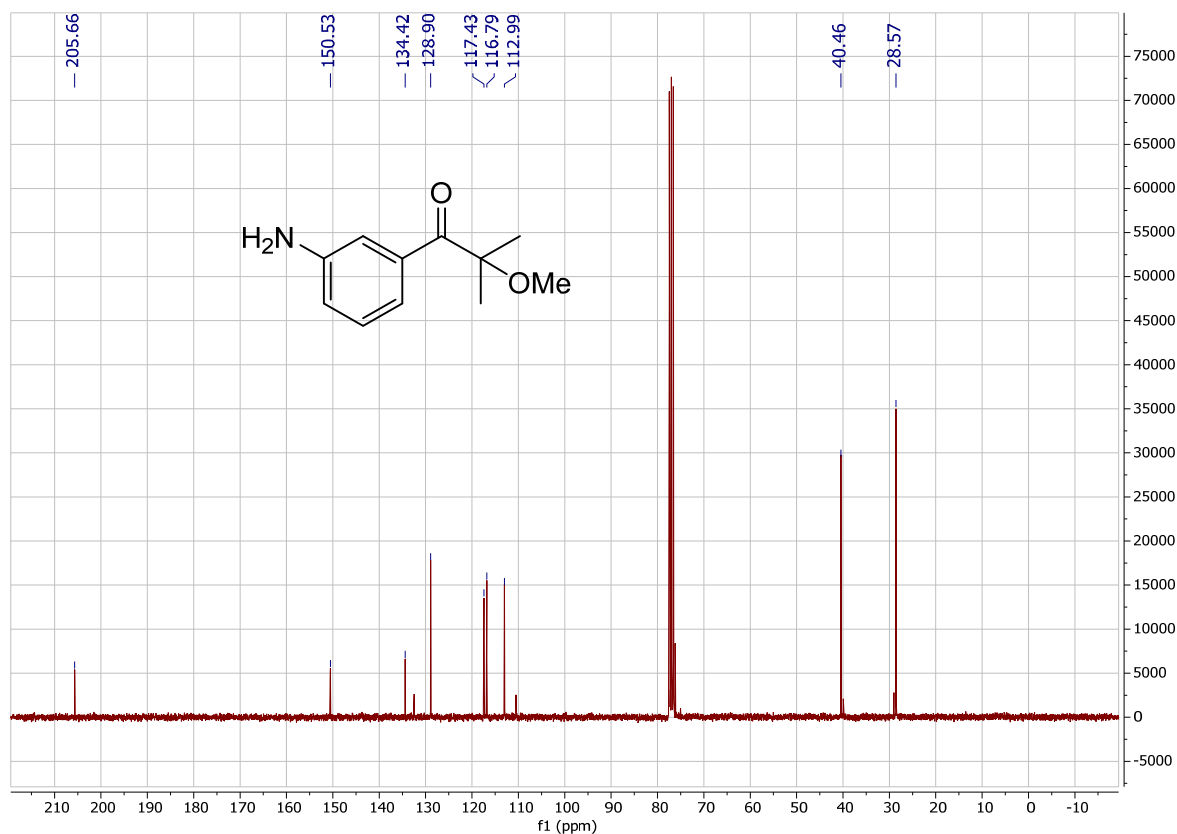

<sup>1</sup>H NMR spectrum of 3-(2-methoxy-2-methylpropanoyl)-N,N,N-trimethylbenzenaminium iodide

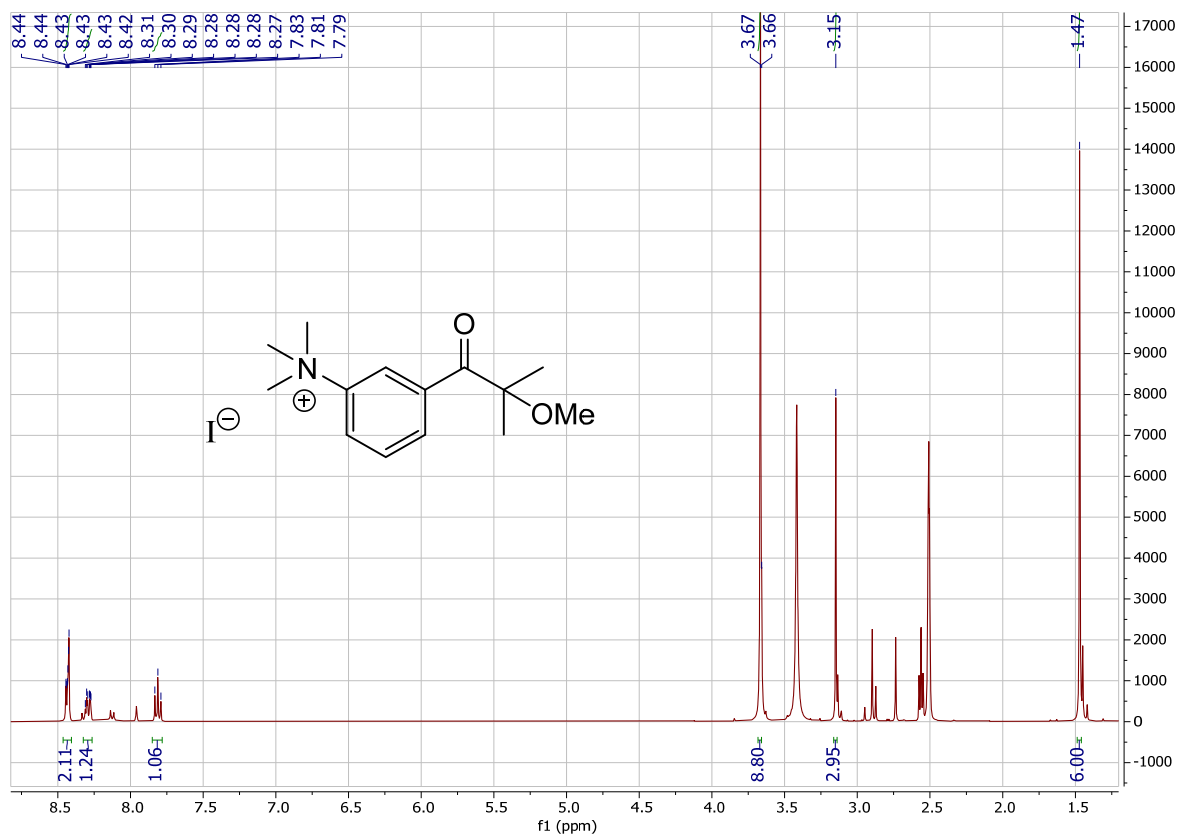

<sup>13</sup>C NMR spectrum of 3-(2-methoxy-2-methylpropanoyl)-N,N,N-trimethylbenzenaminium iodide

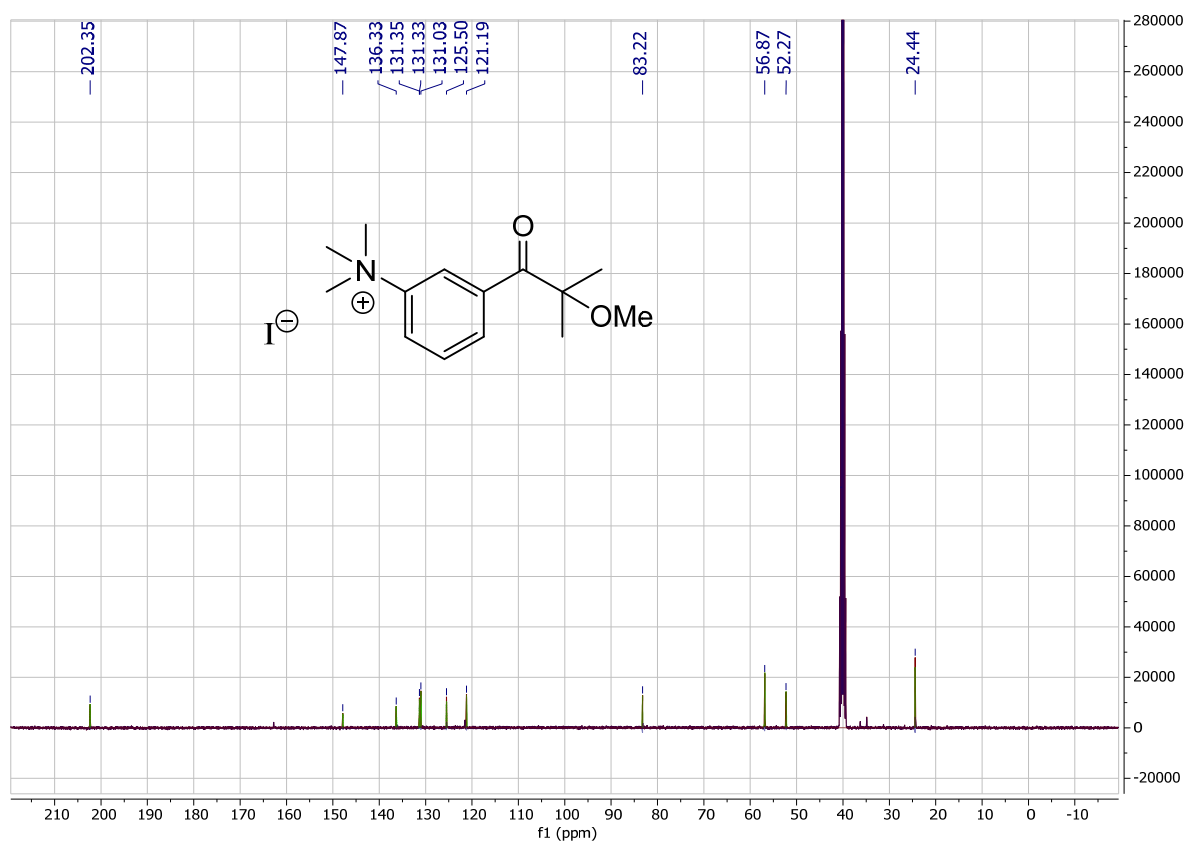

<sup>1</sup>H NMR spectrum of 3-(2-hydroxy-2-methylpropanoyl)-N,N,N-trimethylbenzenaminium iodide

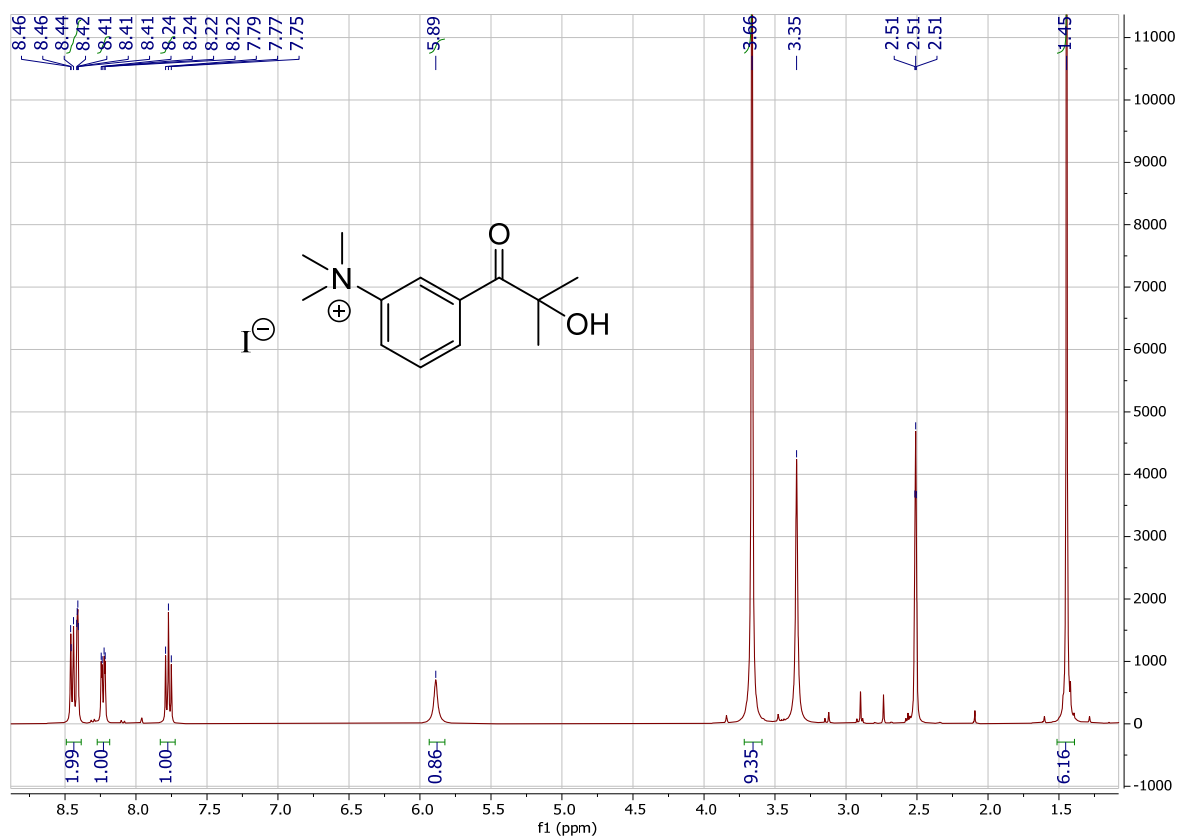

<sup>13</sup>C NMR spectrum of 3-(2-hydroxy-2-methylpropanoyl)-N,N,N-trimethylbenzenaminium iodide

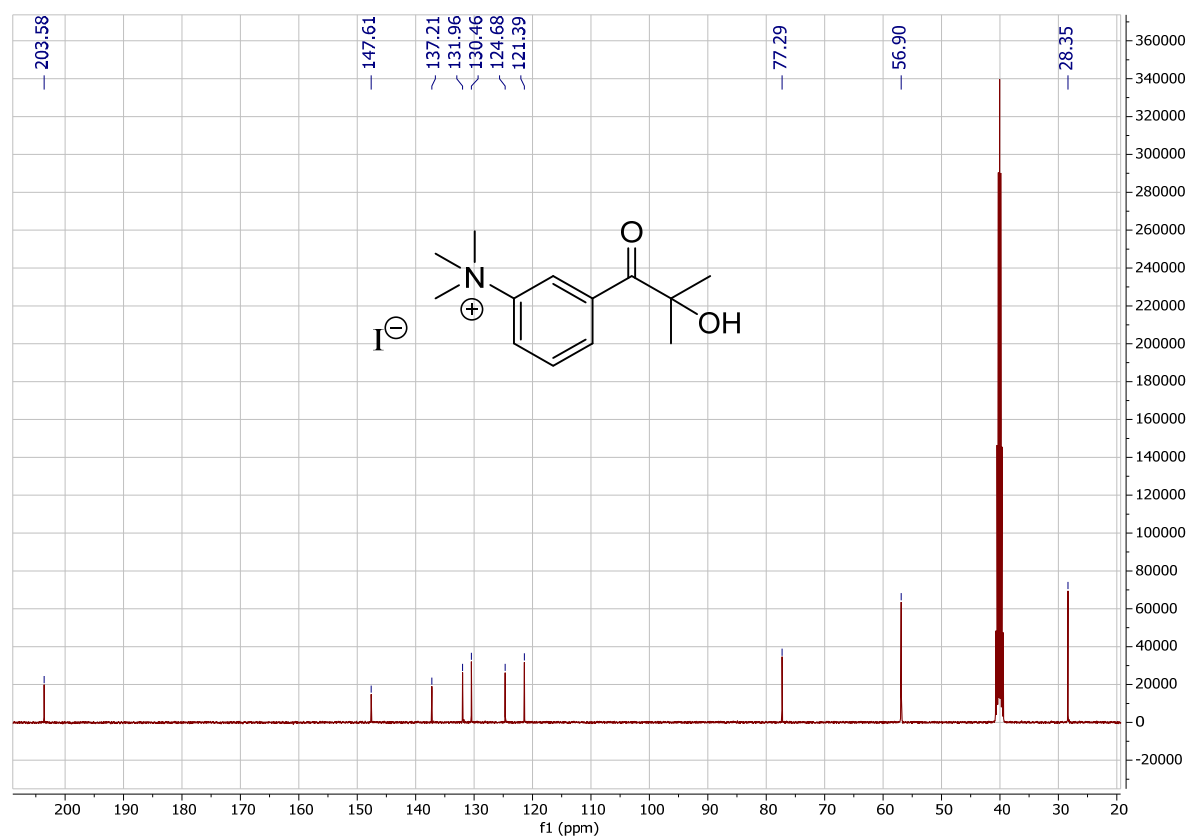

Figure S2. Other used Chemicals and NMR spectra.
